# Supplementary material for: A tripartite survey of hyperparasitic fungi associated with ectoparasitic flies on bats (Mammalia: Chiroptera) in a neotropical cloud forest in Panama
Source: PubMed Central journal article supplement (PMC5892177; doi:10.1051/parasite/2018017), 2018-04-10

**Table S1.** List of bat species captured at Chucantí Nature Reserve in the Darién Province, Panama. For each species, number of captured individuals (N), average forearm length (in mm), and average body mass (in g) are provided. Recaptures are not included in sample sizes or averages. Photos: Danny Haelewaters and Annabel Dorrestein.

|                                                                                                                                   |                                                                                      |
|-----------------------------------------------------------------------------------------------------------------------------------|--------------------------------------------------------------------------------------|
| <p><i>Artibeus jamaicensis</i>    N = 43<br/>Avg. forearm = 62.3 mm, <i>n</i> = 43<br/>Avg. body mass = 47.9 g, <i>n</i> = 42</p> |   |
| <p><i>Artibeus lituratus</i>    N = 11<br/>Avg. forearm = 63.6 mm, <i>n</i> = 11<br/>Avg. body mass = 45.9 g, <i>n</i> = 8</p>    |  |

---

*Carollia brevicauda*

N = 4

Photos not available

Avg. forearm = 39.5 mm,  $n = 4$

Avg. body mass = 18 g,  $n = 4$

---

*Carollia perspicillata*

N = 142

Avg. forearm = 42.3 mm,  $n = 142$

Avg. body mass = 20.8 g,  $n = 138$

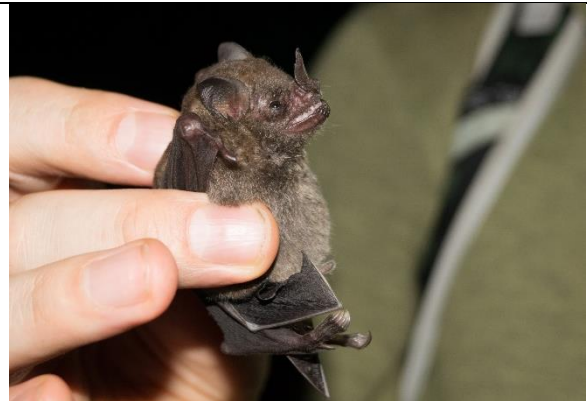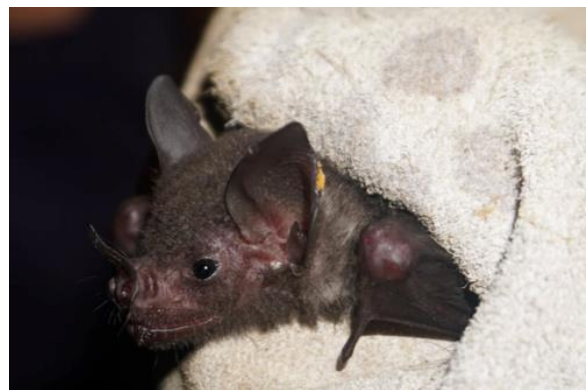

---

*Desmodus rotundus*

N = 2

Avg. forearm = 61.0 mm,  $n = 2$

Avg. body mass = 41 g,  $n = 1$

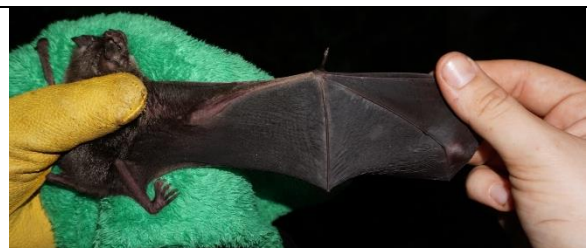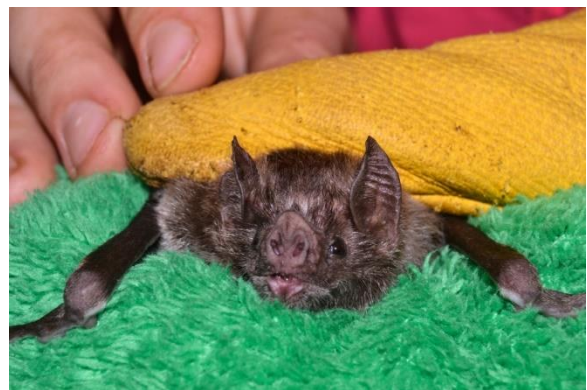

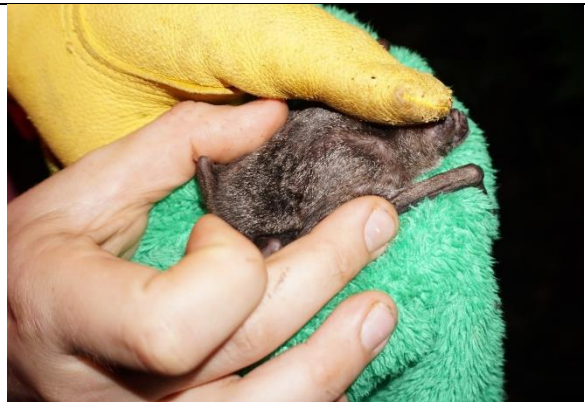

*Enchisthenes hartii*

N = 1

Avg. forearm = 42.3 mm,  $n = 1$

Avg. body mass = 21 g,  $n = 1$

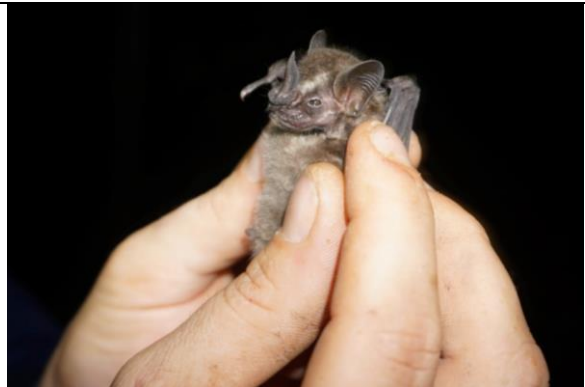

*Glossophaga  
commissarisi*

N = 2

Avg. forearm = 32.1 mm,  $n = 2$

Avg. body mass = 8 g,  $n = 2$

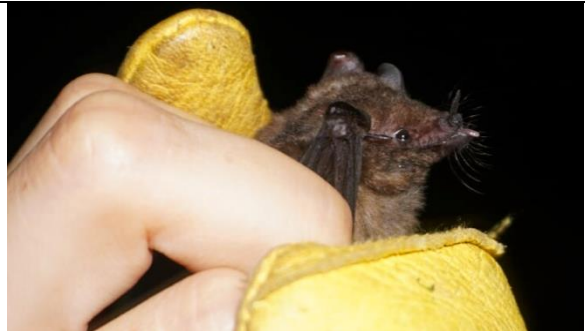

*Lichonycteris obscura*

N = 1

*Photos not available*

Avg. forearm = 33.2 mm,  $n = 1$

Avg. body mass = n/a

*Micronycteris microtis*

N = 1

Avg. forearm = 34.2 mm,  $n = 1$

Avg. body mass = 6 g,  $n = 1$

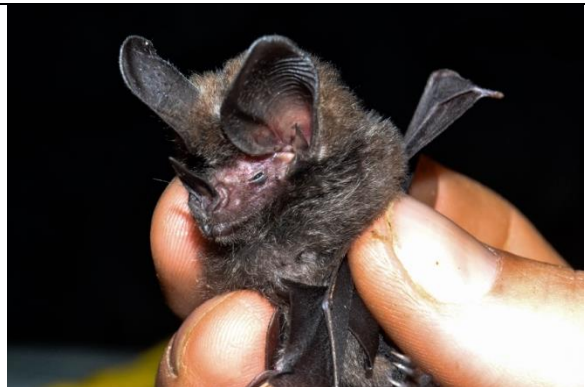

*Micronycteris  
schmidtorum*

N = 1  
Avg. forearm = 33.8 mm, *n* = 1  
Avg. body mass = n/a

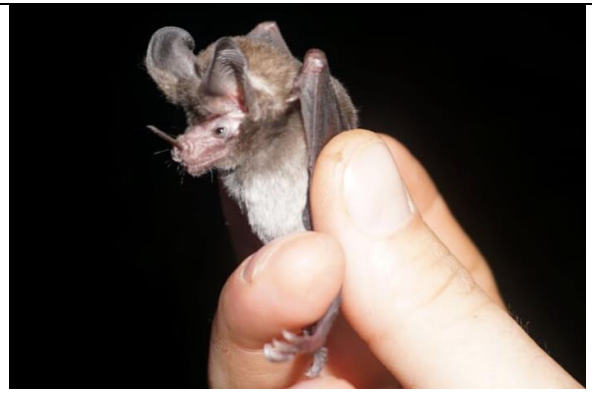

*Myotis riparius*

N = 5  
Avg. forearm = 38.3 mm, *n* = 5  
Avg. body mass = 5.6 g, *n* = 5

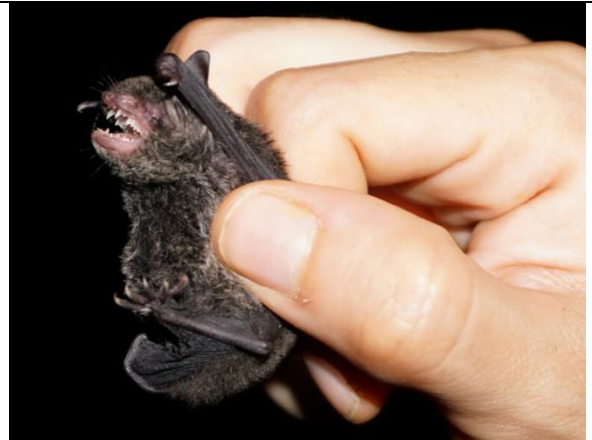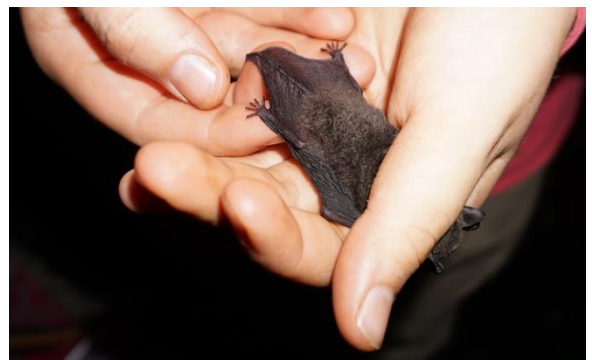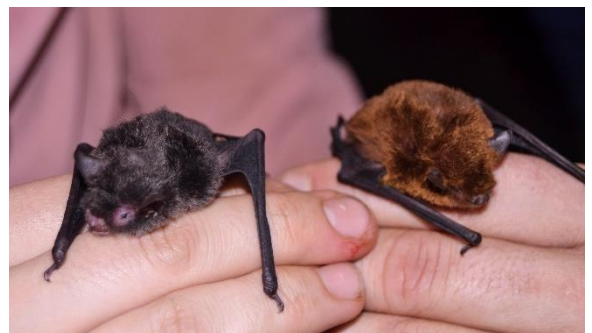

---

*Platyrrhinus dorsalis*

N = 1

Avg. forearm = 53.4 mm, n = 1

Avg. body mass = 51 g, n = 1

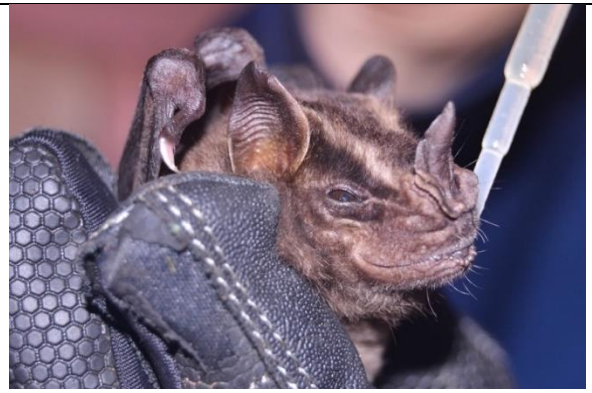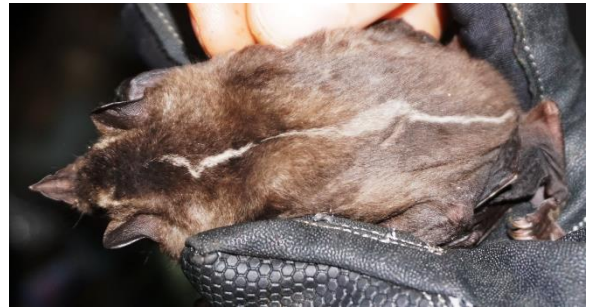

---

*Platyrrhinus helleri*

N = 1

Avg. forearm = 38.9 mm, n = 1

Avg. body mass = 33 g, n = 1

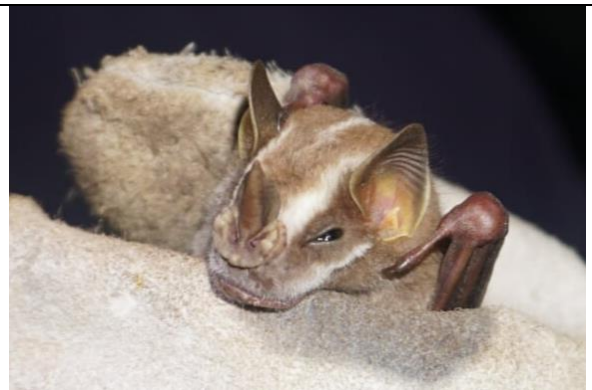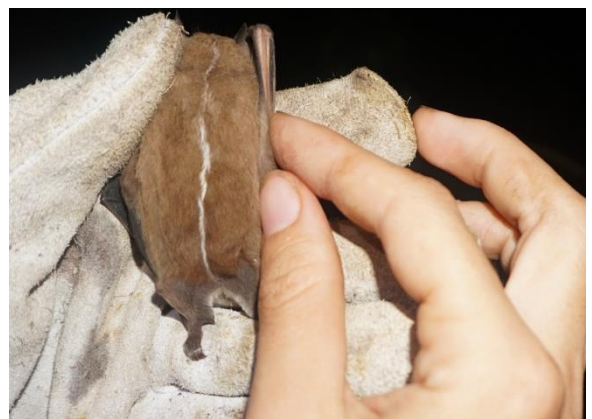

*Pteronotus  
gymnotus*

N = 2  
Avg. forearm = 53.3 mm,  $n = 2$   
Avg. body mass = 18 g,  $n = 2$

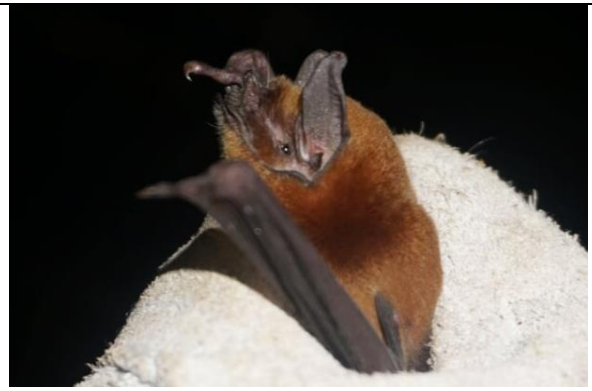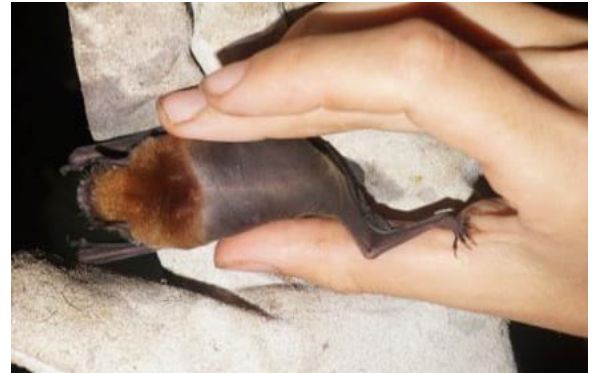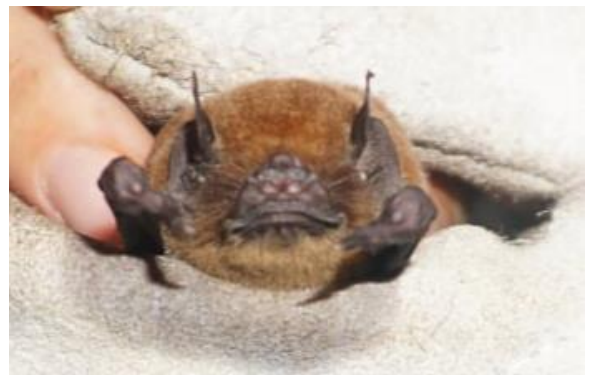

*Pteronotus  
parnellii*

N = 4  
Avg. forearm = 61.3 mm,  $n = 4$   
Avg. body mass = 27.3 g,  $n = 4$

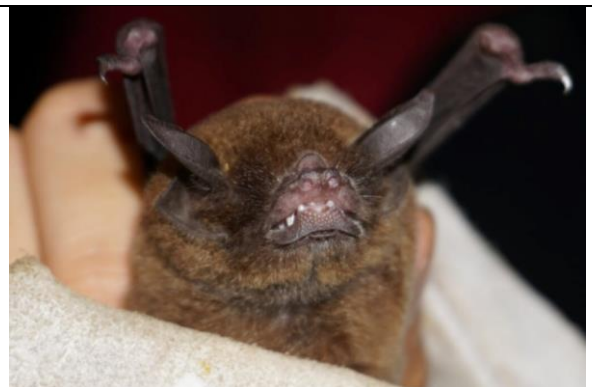

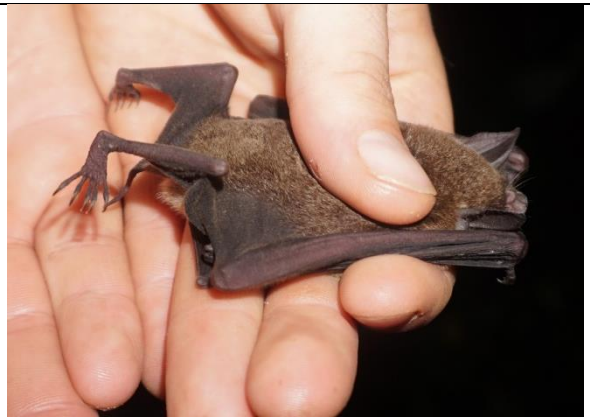

---

*Sturnira luisi*

N = 1

Avg. forearm = 43.1 mm,  $n = 1$

Avg. body mass = 24 g,  $n = 1$

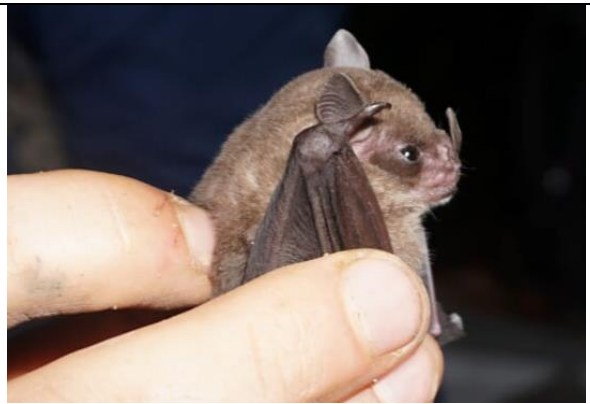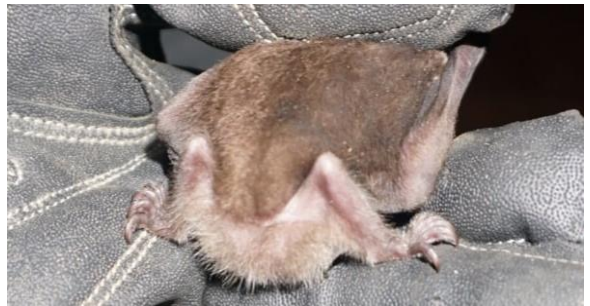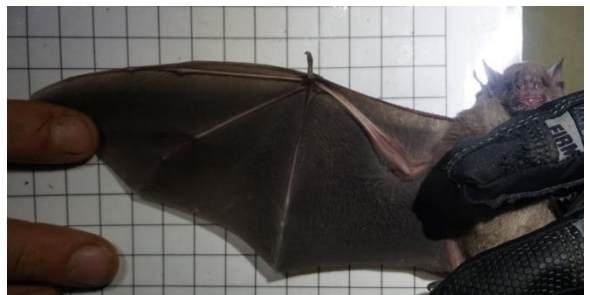

Supplement: parasite-25-19-s1.pdf [file parasite-25-19-s1.pdf]
